# Supplementary material for: Synthesis of stable γ-phase MnS1−xSex nanoflakes with inversion symmetry breaking
Source: Royal Society of Chemistry journal article supplement (doi:10.1039/d2nr05136b), 2022-01-01
Supplement: d2nr05136b1.pdf [file d2nr05136b1.pdf]

## Supporting Information

### Synthesis of stable $\gamma$ -phase $\text{MnS}_{1-x}\text{Se}_x$ nanoflakes with inversion symmetry breaking

Bo Zheng<sup>1#</sup>, Jun Fu<sup>2#</sup>, Yuanmin Zhu<sup>3,6#</sup>, Jing Liang<sup>4#</sup>, Yongzhi She<sup>5</sup>, Junxiang Xiang<sup>1</sup>,  
Xiang Ma<sup>1</sup>, Ying Zhang<sup>1</sup>, Shasha Wang<sup>1</sup>, Guojing Hu<sup>1</sup>, Yuehui Zhou<sup>1</sup>, Yan Feng<sup>1</sup>,  
Zhengping Fu<sup>1</sup>, Nan Pan<sup>5</sup>, Yalin Lu<sup>1\*</sup>, Hualing Zeng<sup>2</sup>, Meng Gu<sup>6</sup>, Kaihui Liu<sup>4</sup>, Bin  
Xiang<sup>1\*</sup>

**Note S1:** Similar to the reported work, the SHG intensity increase with the increase of incident laser power, showing a parabola-like shape ( $I \propto P^\theta$ ,  $\theta = 2.04 \pm 0.02$ ), because SHG is a second-order nonlinear optical process, which should be quadratic proportional to the incident laser intensity. The electric dipole theory forecasts that under the first-order perturbation  $I_{\text{SHG}} = |E(2\omega)|^2 \propto |P(\omega)|^2$ , where  $I_{\text{SHG}}$  is the SHG intensity,  $E(2\omega)$  is SHG electric field vector, and  $P(\omega)$  is excitation power<sup>1</sup>.

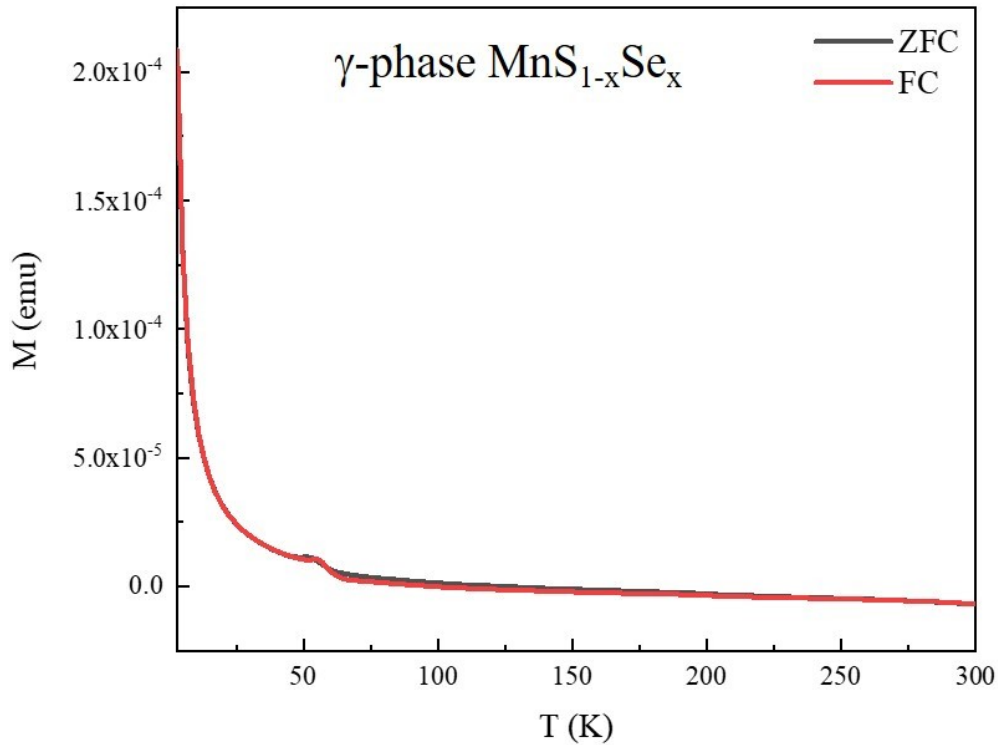

**Figure S1.** ZFC and FC magnetization curves of  $\gamma$ -phase  $\text{MnS}_{1-x}\text{Se}_x$  ( $x=0.09$ ) nanoflakes measured with the external magnetic field  $H = 9$  T applied along the  $c$  axis.

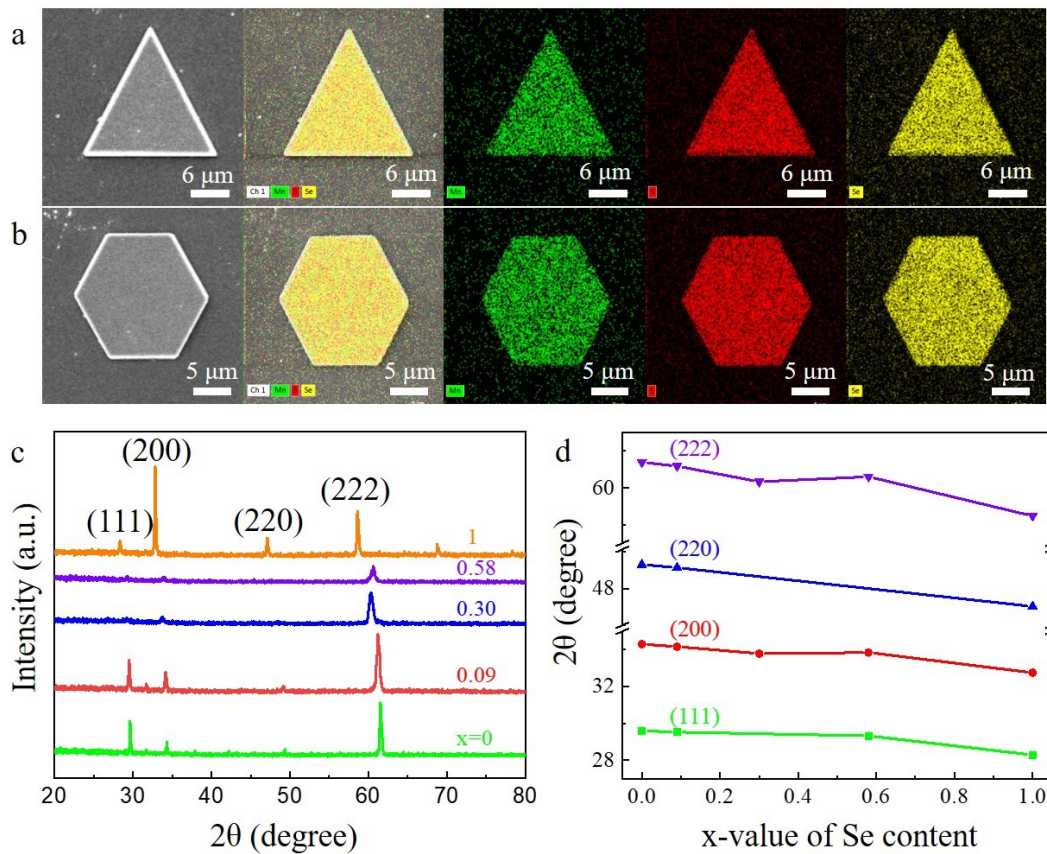

**Figure S2.** EDS elemental mapping images of Mn, S and Se in a typical MnS<sub>1-x</sub>Se<sub>x</sub> (x=0.30) nanosheet with the shape of a triangle (a) and hexagon (b). (c) XRD patterns of as-synthesized α-phase MnS<sub>1-x</sub>Se<sub>x</sub> nanosheets with x values of 0, 0.09, 0.3, 0.58 and 1. (d) Plots of XRD diffraction peaks determined from (c) as a function of the Se composition x.

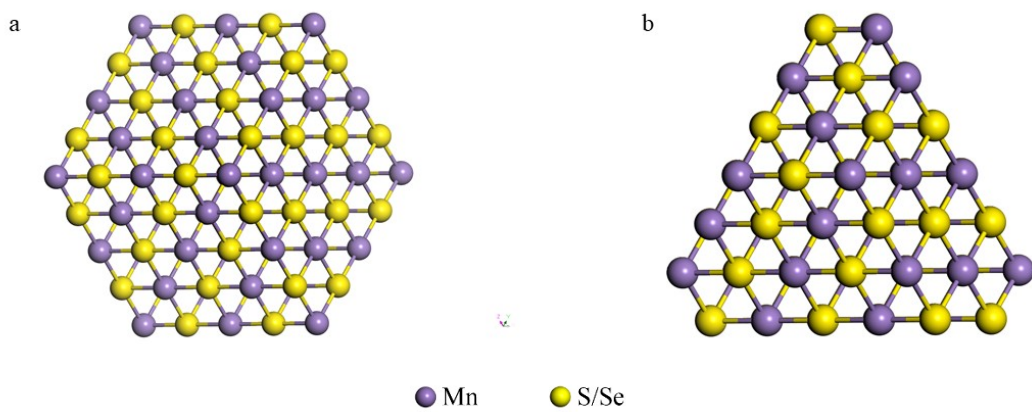

**Figure S3.** The ball-and-stick models of the  $\alpha$ -phase  $\text{MnS}_{1-x}\text{Se}_x$  crystal with the shape of hexagon (a) and triangle (b).

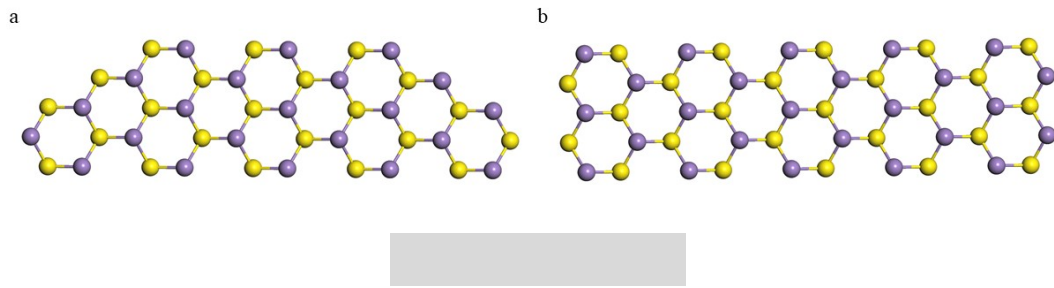

**Figure S4.** The ball-and-stick models of the  $\gamma$ -phase  $\text{MnS}_{1-x}\text{Se}_x$  crystal with the shape of trapezoid (a) and rectangle (b).

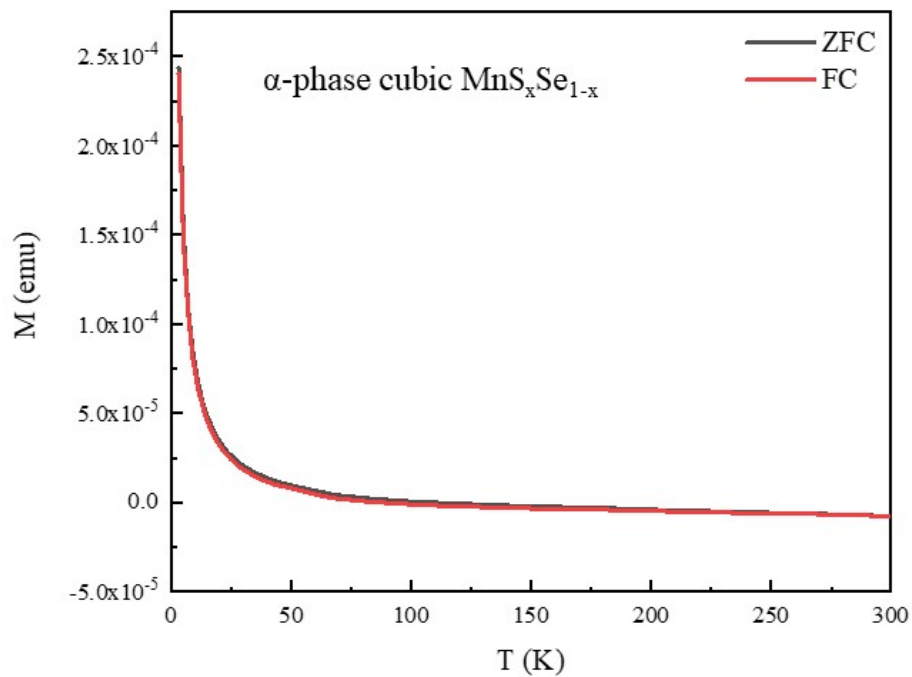

**Figure S5.** ZFC and FC magnetization curves of  $\alpha$ -phase  $\text{MnS}_{1-x}\text{Se}_x$  ( $x=0.58$ ) measured with the external magnetic field  $H = 9$  T applied along the  $c$  axis.

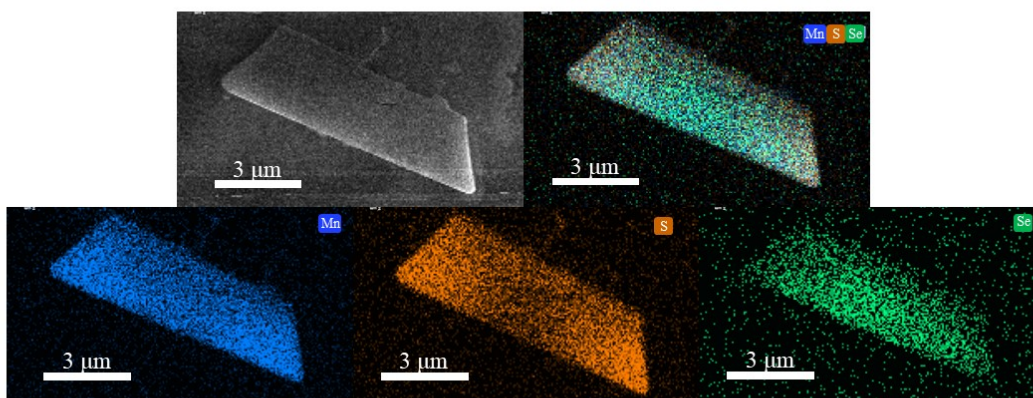

**Figure S6.** EDS elemental mapping images of Mn, S and Se in a typical  $\gamma$ -phase  $\text{MnS}_{1-x}\text{Se}_x$  ( $x=0.27$ ) nanosheet with the shape of a trapezoid.

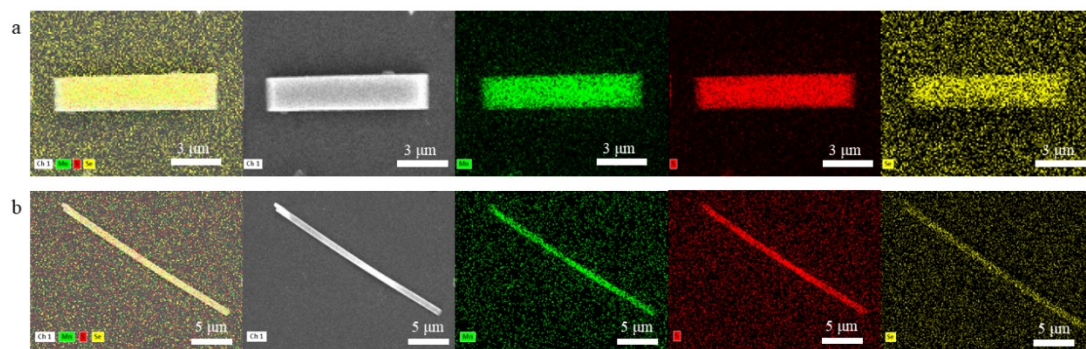

**Figure S7.** EDS elemental mapping images of Mn, S and Se in a typical rectangular (a)  $\gamma$ -phase  $\text{MnS}_{1-x}\text{Se}_x$  ( $x=0.09$ ) nanosheet and (b)  $\gamma$ -phase  $\text{MnS}_{1-x}\text{Se}_x$  ( $x=0.27$ ) nanowire.



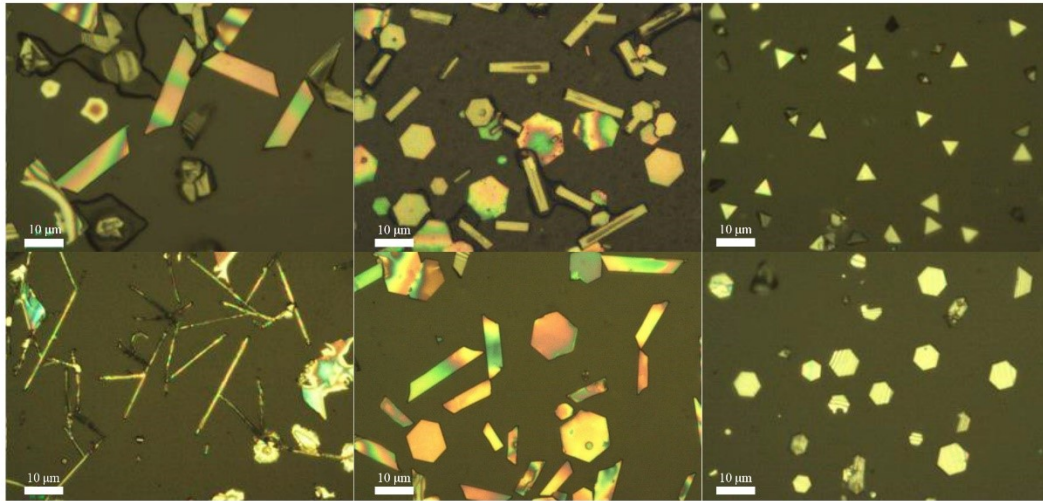

**Figure S8.** The different morphology of  $\gamma$ -phase  $\text{MnS}_{1-x}\text{Se}_x$  ( $x=0.09$ ) and  $\alpha$ -phase  $\text{MnS}_{1-x}\text{Se}_x$  ( $x=0.30$ ).

|   | x value (calculated from precursor loading amount) | x value of $\gamma$ -MnS <sub>1-x</sub> Se <sub>x</sub> (obtained from EDS) | x value of $\alpha$ -MnS <sub>1-x</sub> Se <sub>x</sub> (obtained from EDS) |
|---|----------------------------------------------------|-----------------------------------------------------------------------------|-----------------------------------------------------------------------------|
| 1 | 0                                                  | 0                                                                           | 0                                                                           |
| 2 | 0.25                                               | 0.02                                                                        | 0.09                                                                        |
| 3 | 0.5                                                | 0.09                                                                        | 0.30                                                                        |
| 4 | 0.75                                               | 0.27                                                                        | 0.58                                                                        |
| 5 | 1                                                  | 0.45                                                                        | 1                                                                           |

**Table S1.** The x value of the as-grown  $\gamma$ -phase MnS<sub>1-x</sub>Se<sub>x</sub> and  $\alpha$ -phase MnS<sub>1-x</sub>Se<sub>x</sub>.

## REFERENCES

1. X. Zhou, J. Cheng, Y. Zhou, T. Cao, H. Hong, Z. Liao, S. Wu, H. Peng, K. Liu and D. Yu, *J. Am. Chem. Soc.*, 2015, **137**, 7994-7997.
